# Supplementary material for: Critical role of the HDAC6–cortactin axis in human megakaryocyte maturation leading to a proplatelet-formation defect
Source: PubMed Central journal article supplement (PMC5702605; doi:10.1038/s41467-017-01690-2), 2017-11-27
Supplement: 41467_2017_1690_MOESM1_ESM.pdf [file 41467_2017_1690_MOESM1_ESM.pdf]

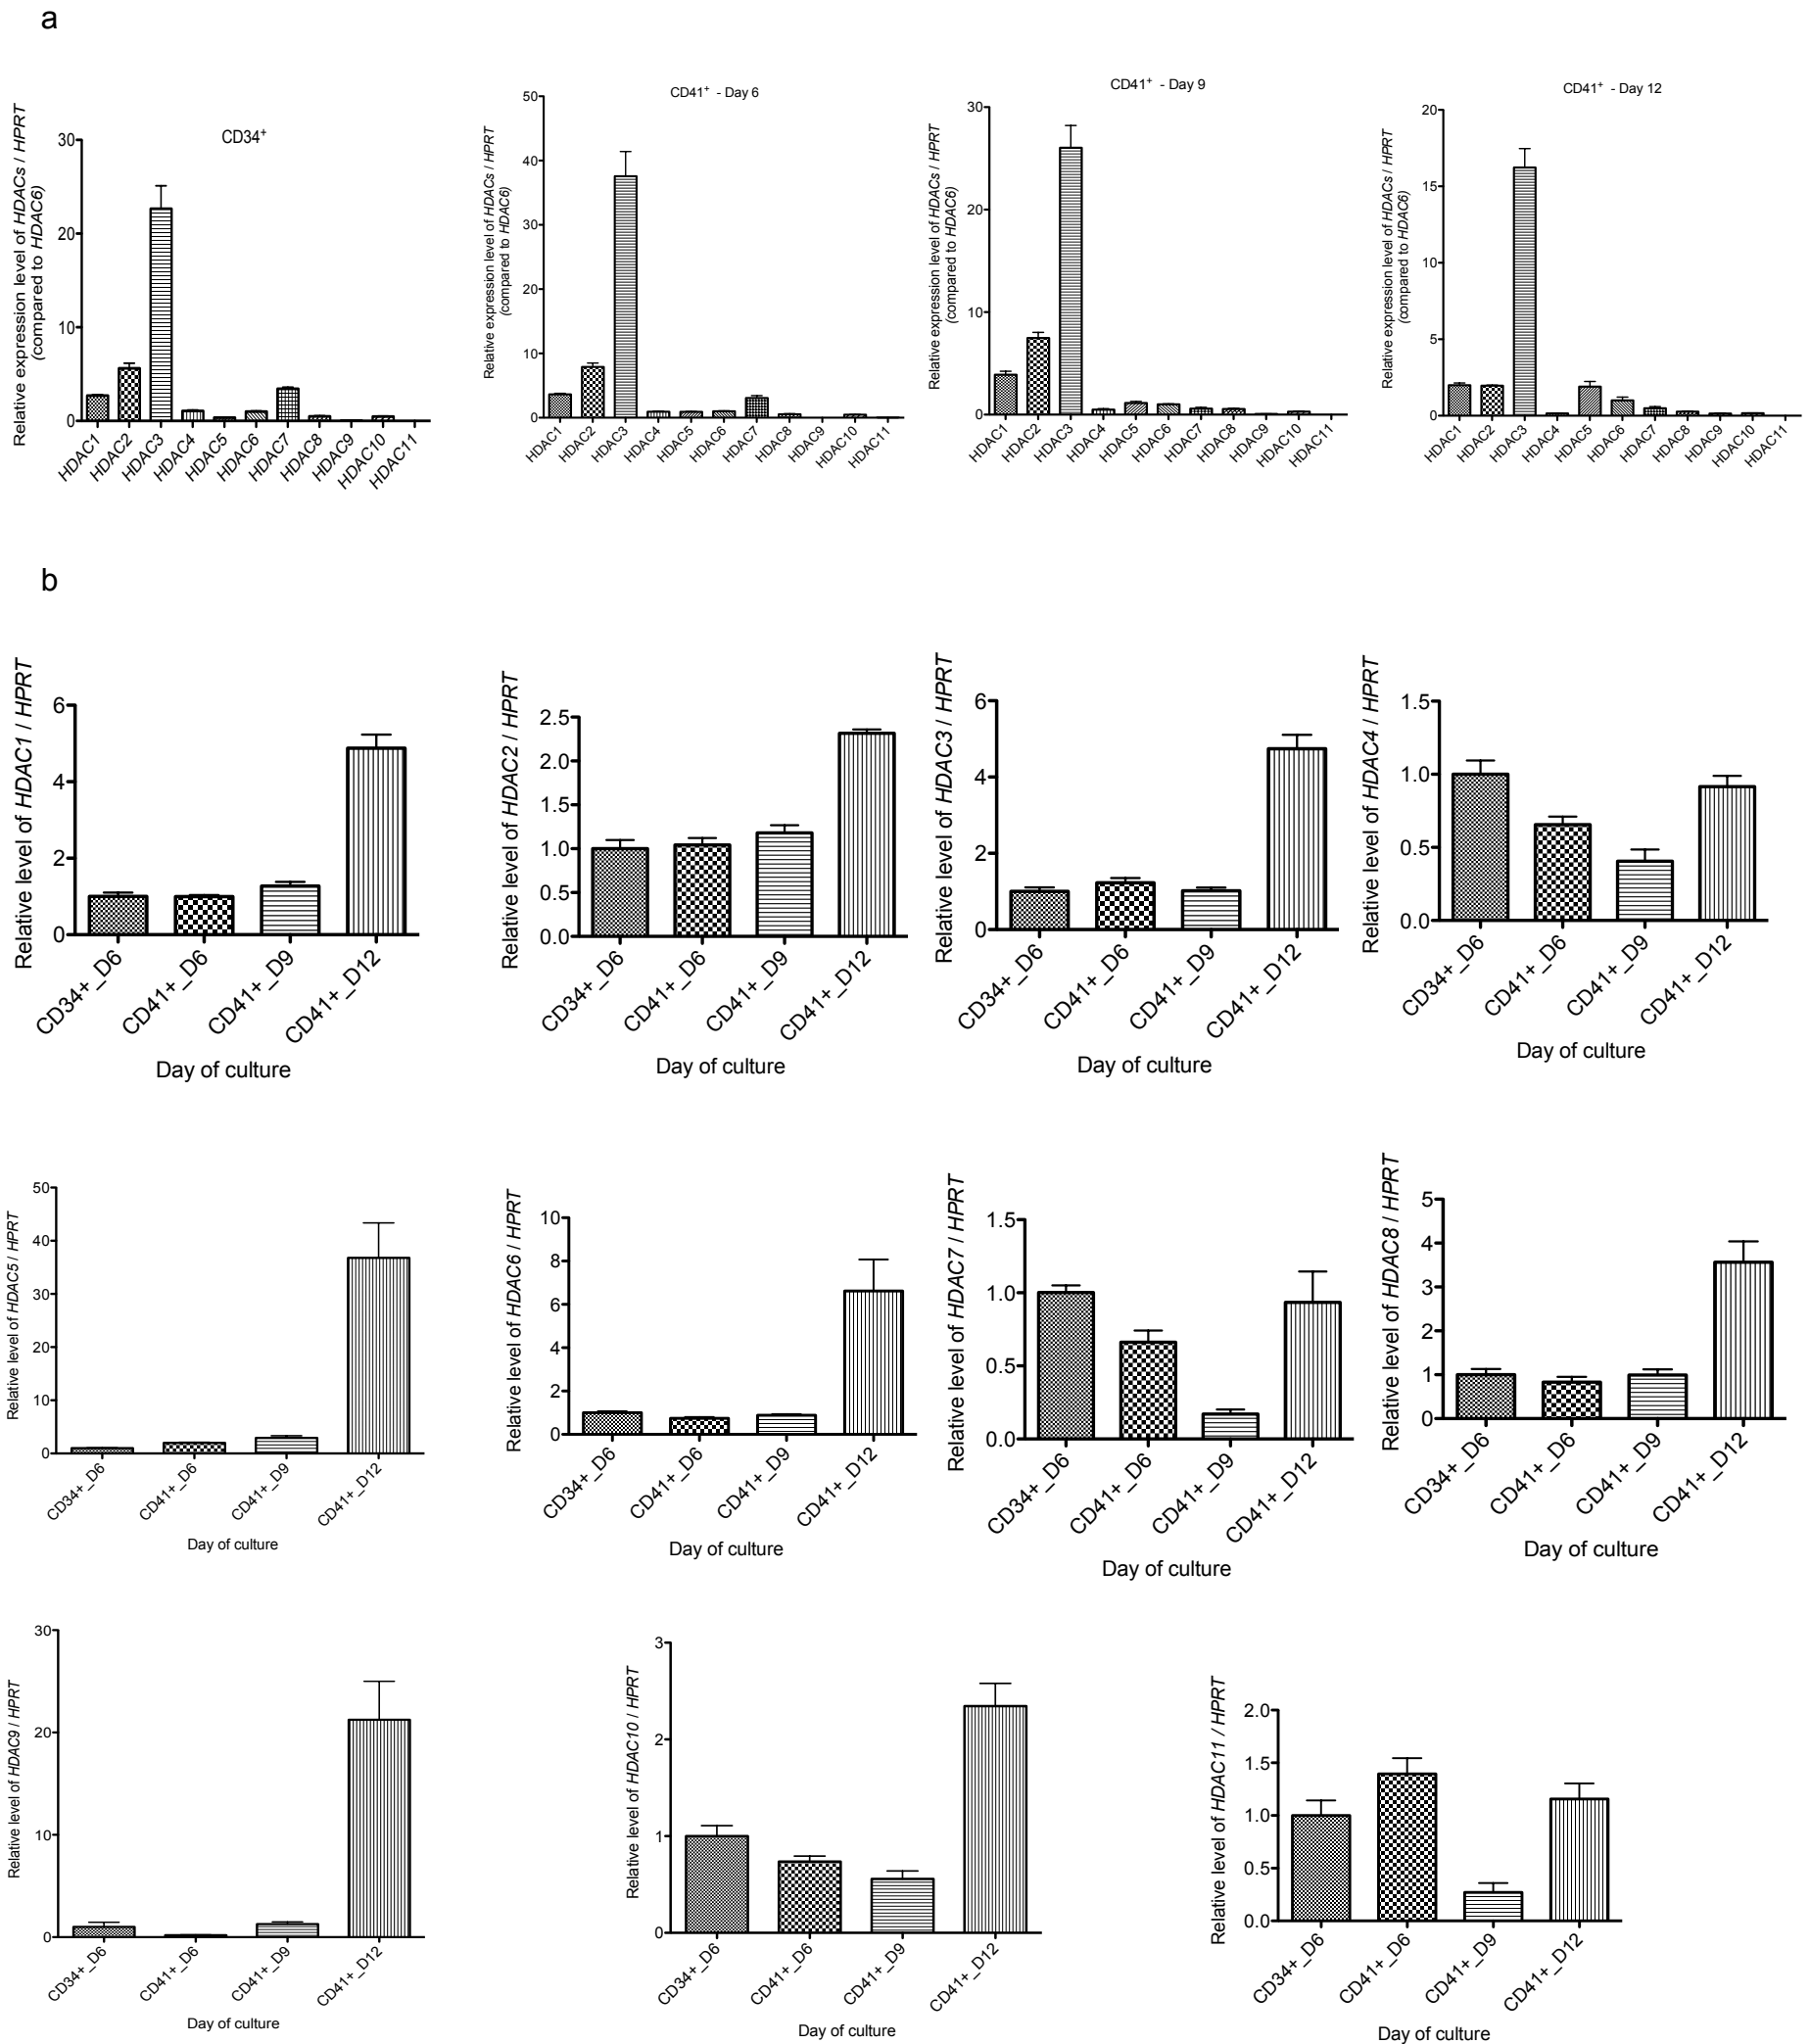

**Supplementary Fig. 1: Modulation of the different HDACs expression during megakaryocyte differentiation.** CD34<sup>+</sup> cells were differentiated to MK and sorted on expression of CD34 and CD41 at day 6 of culture. A fraction of the CD41<sup>+</sup> cells were grown for 3 and 6 additional days allowing MK maturation (a) Relative HDACs mRNA level expression to HPRT mRNA in the CD34 and CD41 Day 6, Day 9 and day 12. (b) Relative HDACs mRNA level expression to HPRT mRNA. Bar graphs represent mean  $\pm$  SD.

**a**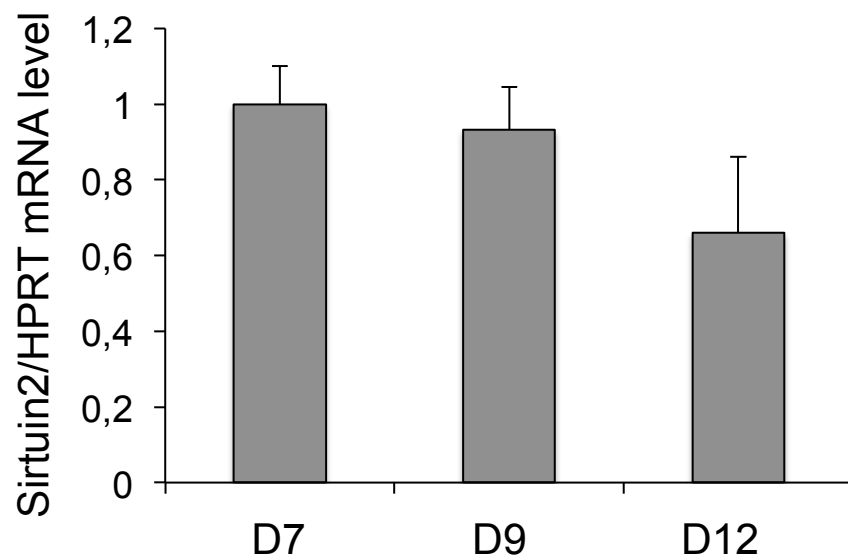**b**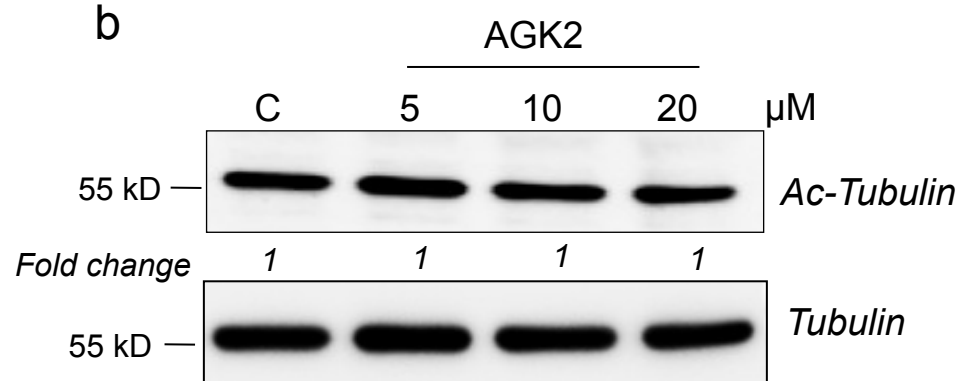**c**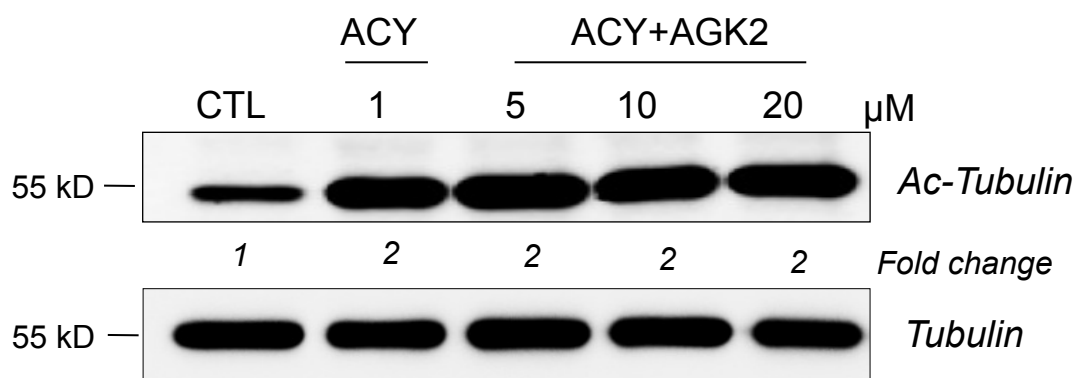**d**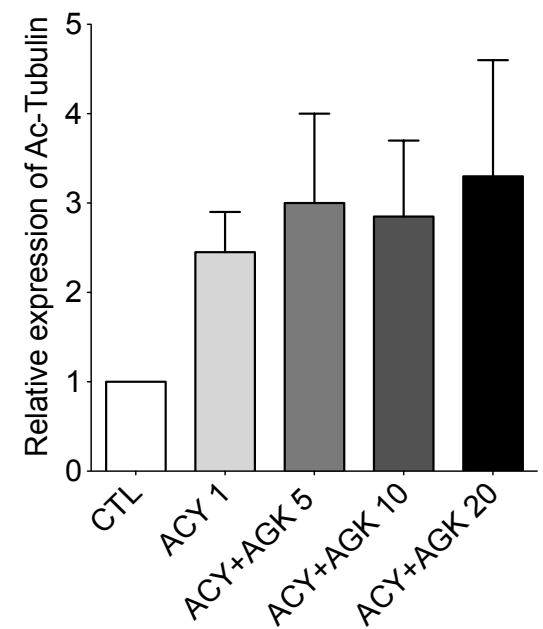

**Supplementary Figure 2. HDAC6 is the main Tubulin deacetylase (TDAC) in MK.** (a) Sirtuin2 expression during megakaryopoiesis. Relative *Sirtuin2* mRNA level expression to HPRT at different times of human MK maturation (Day 7, 9, and 12) Bar graph represent mean  $\pm$  SD. (b-d) Sirtuin2 inhibition has no effect on tubulin acetylation in MK. CD41<sup>+</sup> cells were treated with increasing doses of AGK2 ranging from 5 to 20 $\mu$ M in absence, n=2 (B) or presence of 1 $\mu$ M of ACY1215 (c-d). Bar graph represent mean  $\pm$  SEM

**a**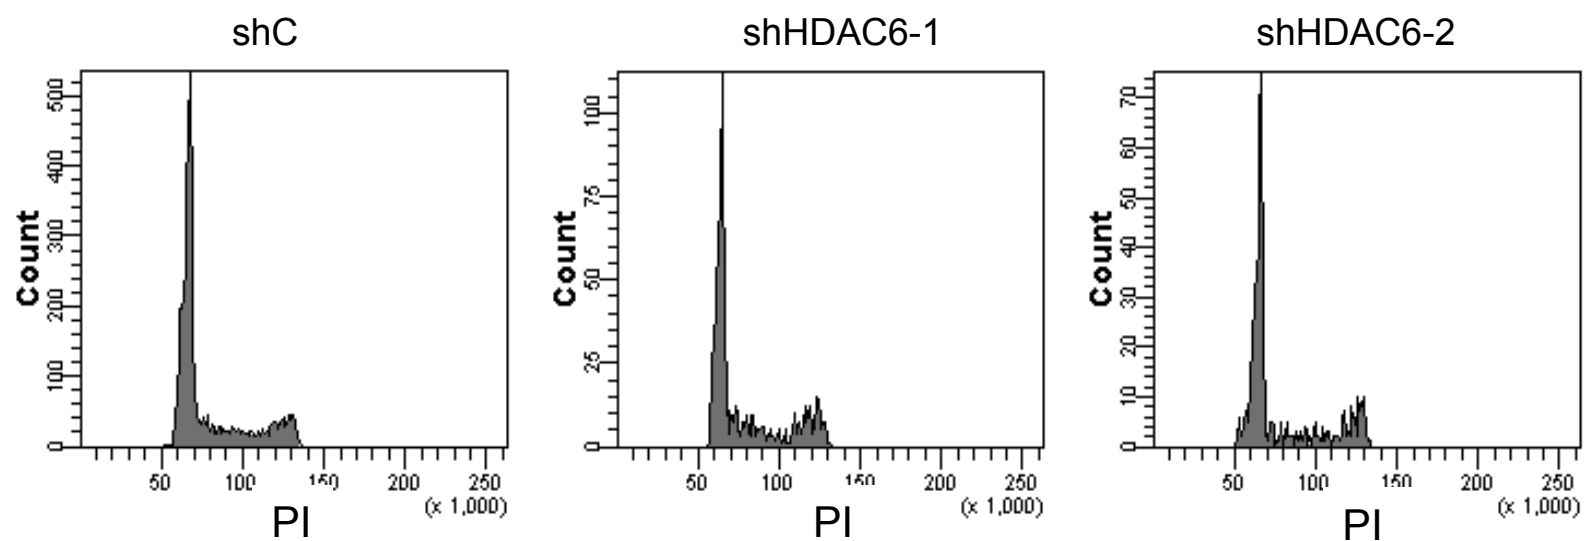**b**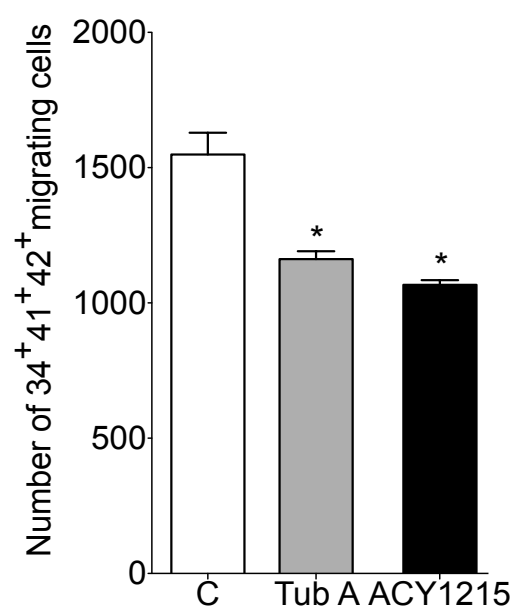**c**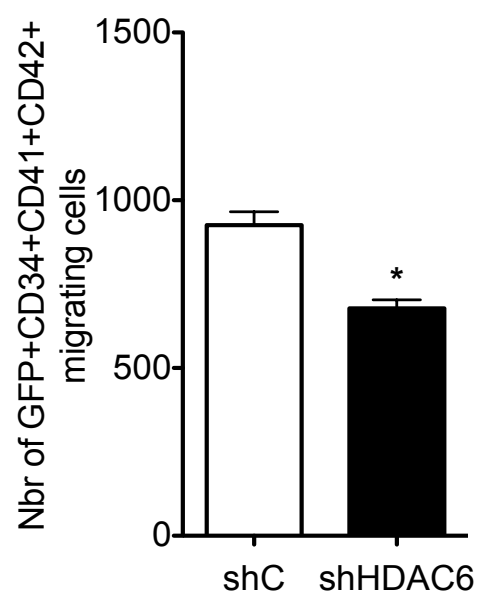

**Supplementary Figure 3. HDAC6 inhibition does not impair cell cycle progression and decreases moderately MK migration.**

**(a)** Cell cycle analysis of CD34<sup>+</sup> cells transduced with the control lentivirus shC, shHDAC6-1 and shHDAC6-2. **(b-c)** Tubastatin, ACY1215 and shHDAC6 decrease slightly MK migration. Unpaired Student's t-test \*p = 0.0343. Bar graphs represent mean ± SEM

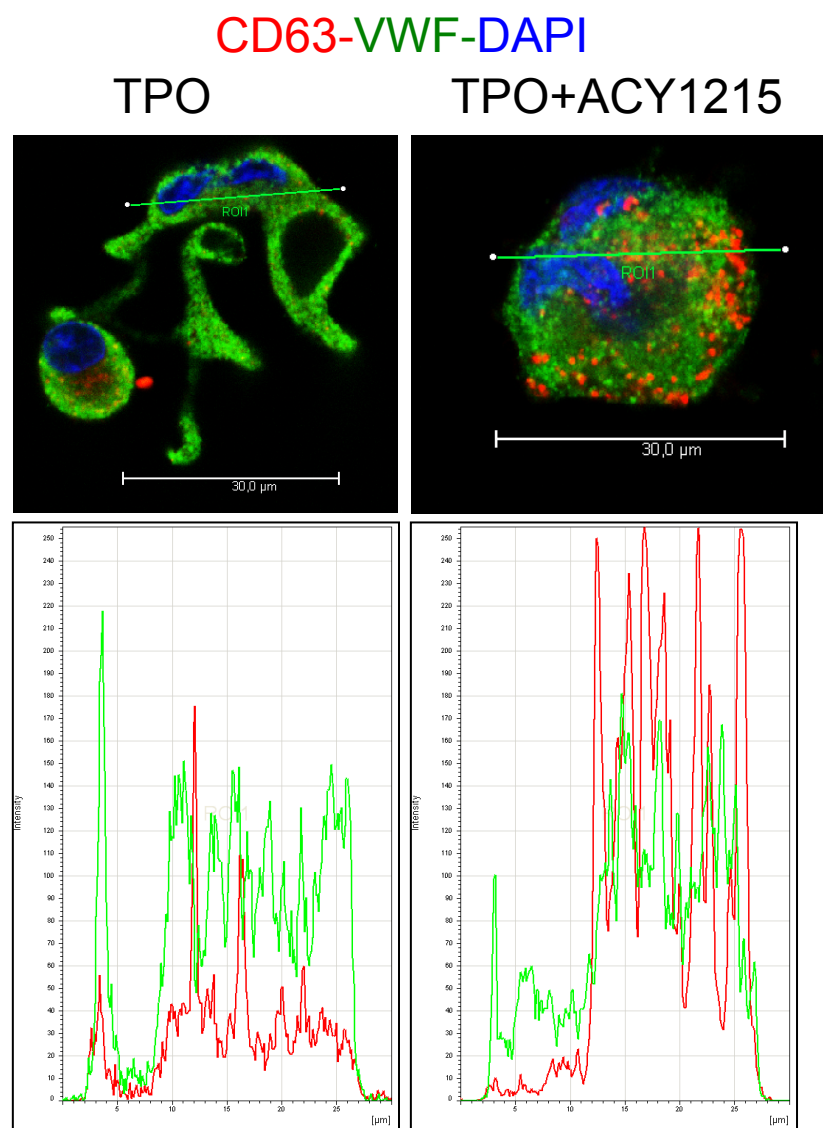

**Supplementary Figure 4:** Colocalization of CD63 and VWF in MK treated with 1 μM of ACY1215. CD63 (red), VWF (green) Dapi (blue) compared to control MK

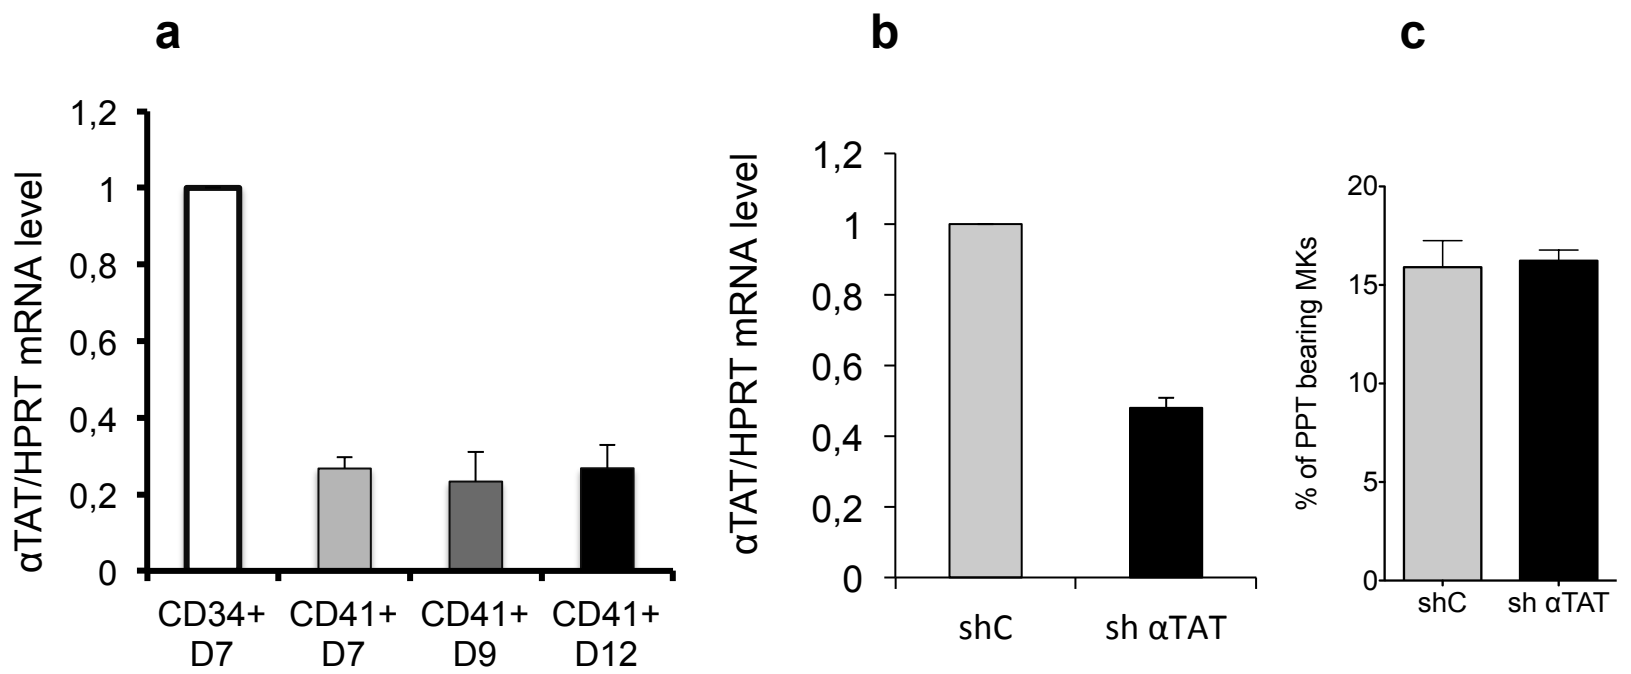

**Supplementary Figure 5.  $\alpha$ TAT silencing has no effect on PFF in vitro.** (a)  $\alpha$ TAT expression during MK maturation. (b-c) CD34<sup>+</sup> cells were transduced with either sh Control (C) or sh $\alpha$ TAT and sorted 48h later on GFP and CD41 expression. A fraction of sorted cells was subject to RT-qPCR analysis (b) and PPF (c) assays. Results are representative of three independent experiments. Bar graphs represent mean  $\pm$  SD (a-b) and SEM (c)

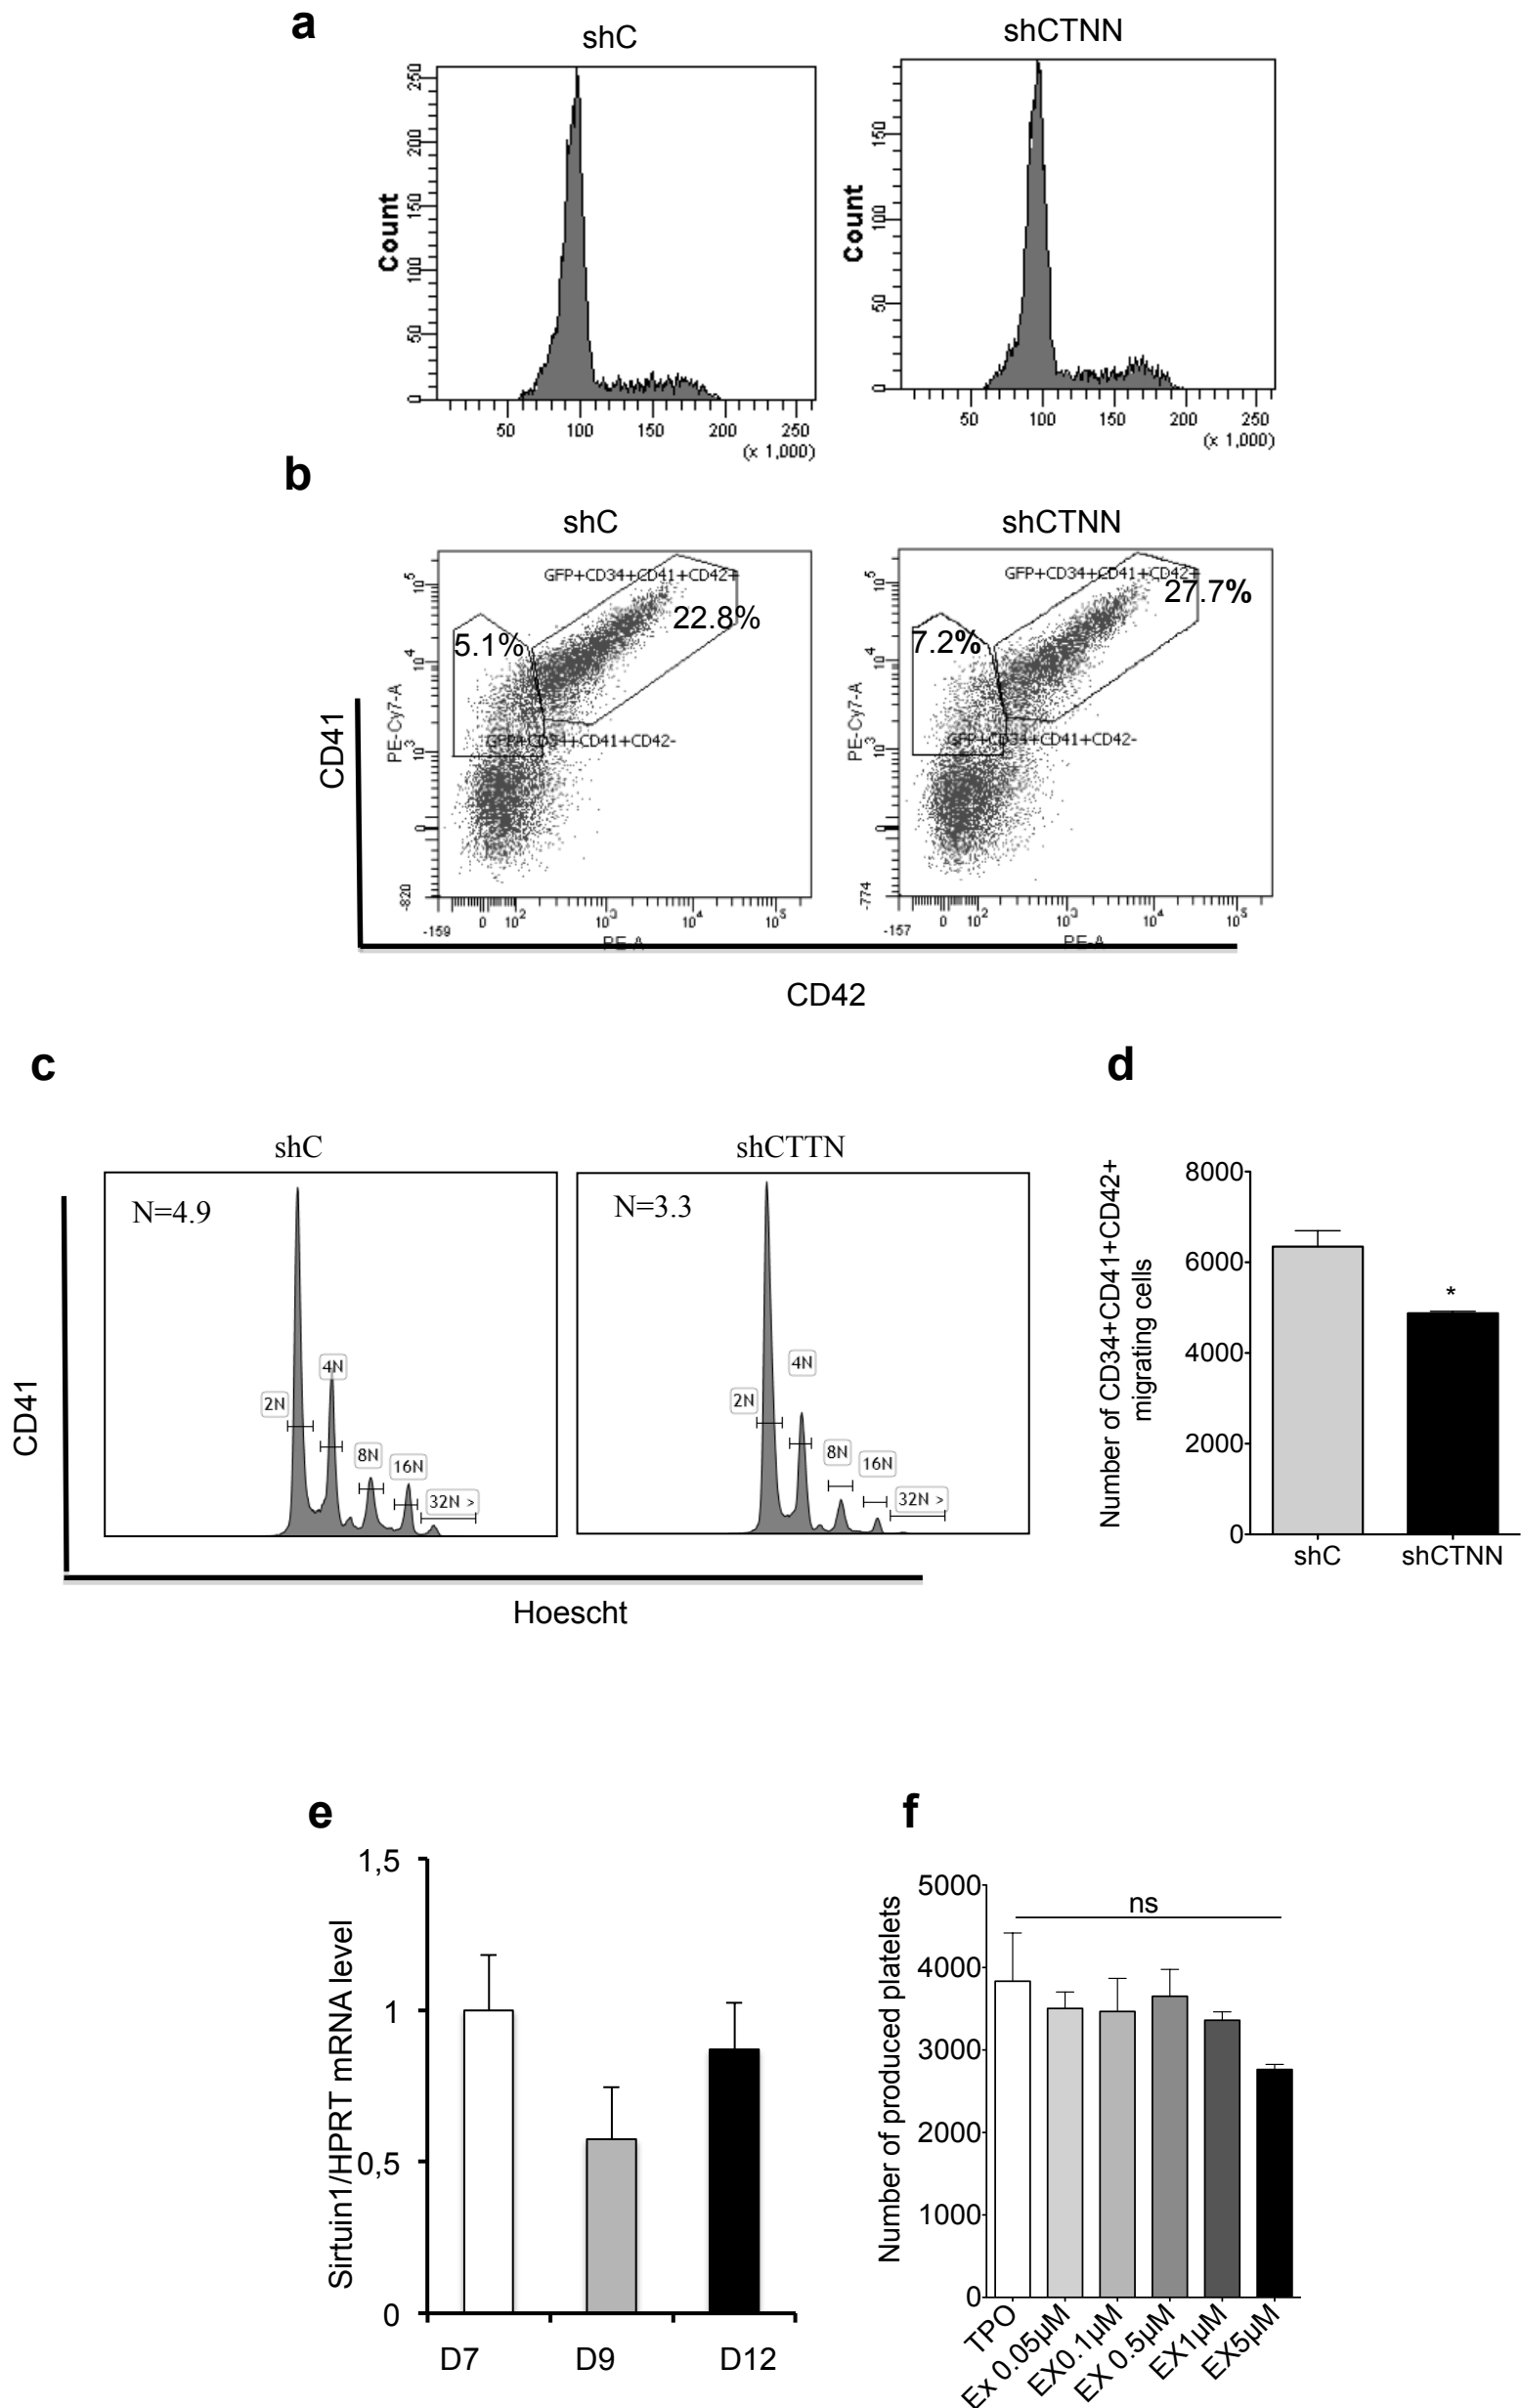

**Supplementary Figure 6. *CTTN* knockdown (a)** does not affect cell cycle progression and **(b)** MK maturation, but **(c)** decreases MK mean ploidy, shC N=4.9; shCTTN N=3.3 and **(d)** slightly MK migration, Unpaired Student's t-test \*P<0.05. **(e)** Relative *Sirtuin1* mRNA level expression to HPRT at different time of MK maturation (Day 7, 9, and 12). **(f)** Sirtuin1 inhibition has no effect on *in vitro* platelet production evaluated by flow cytometry.

# Supplementary Figure 7

Uncropped blots related to Figure 1b

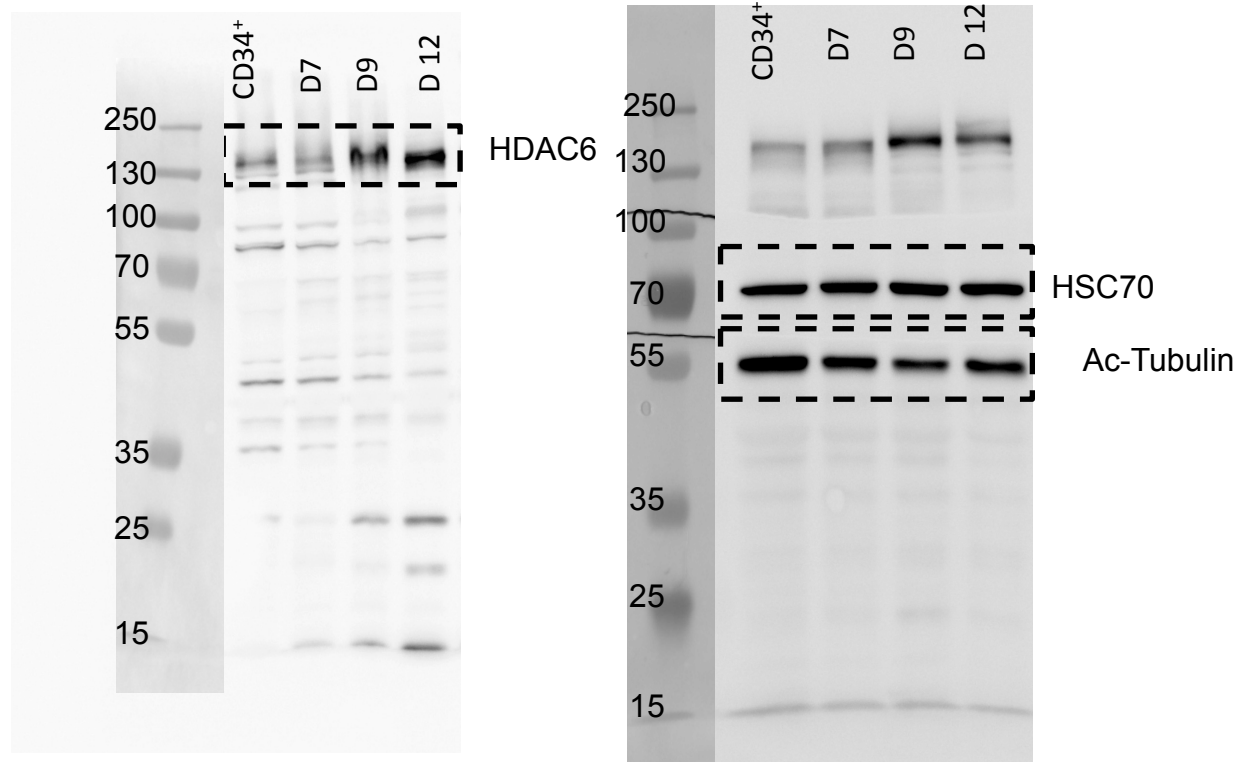

# Supplementary Figure 7

Uncropped blots related to Figure 2 a and g

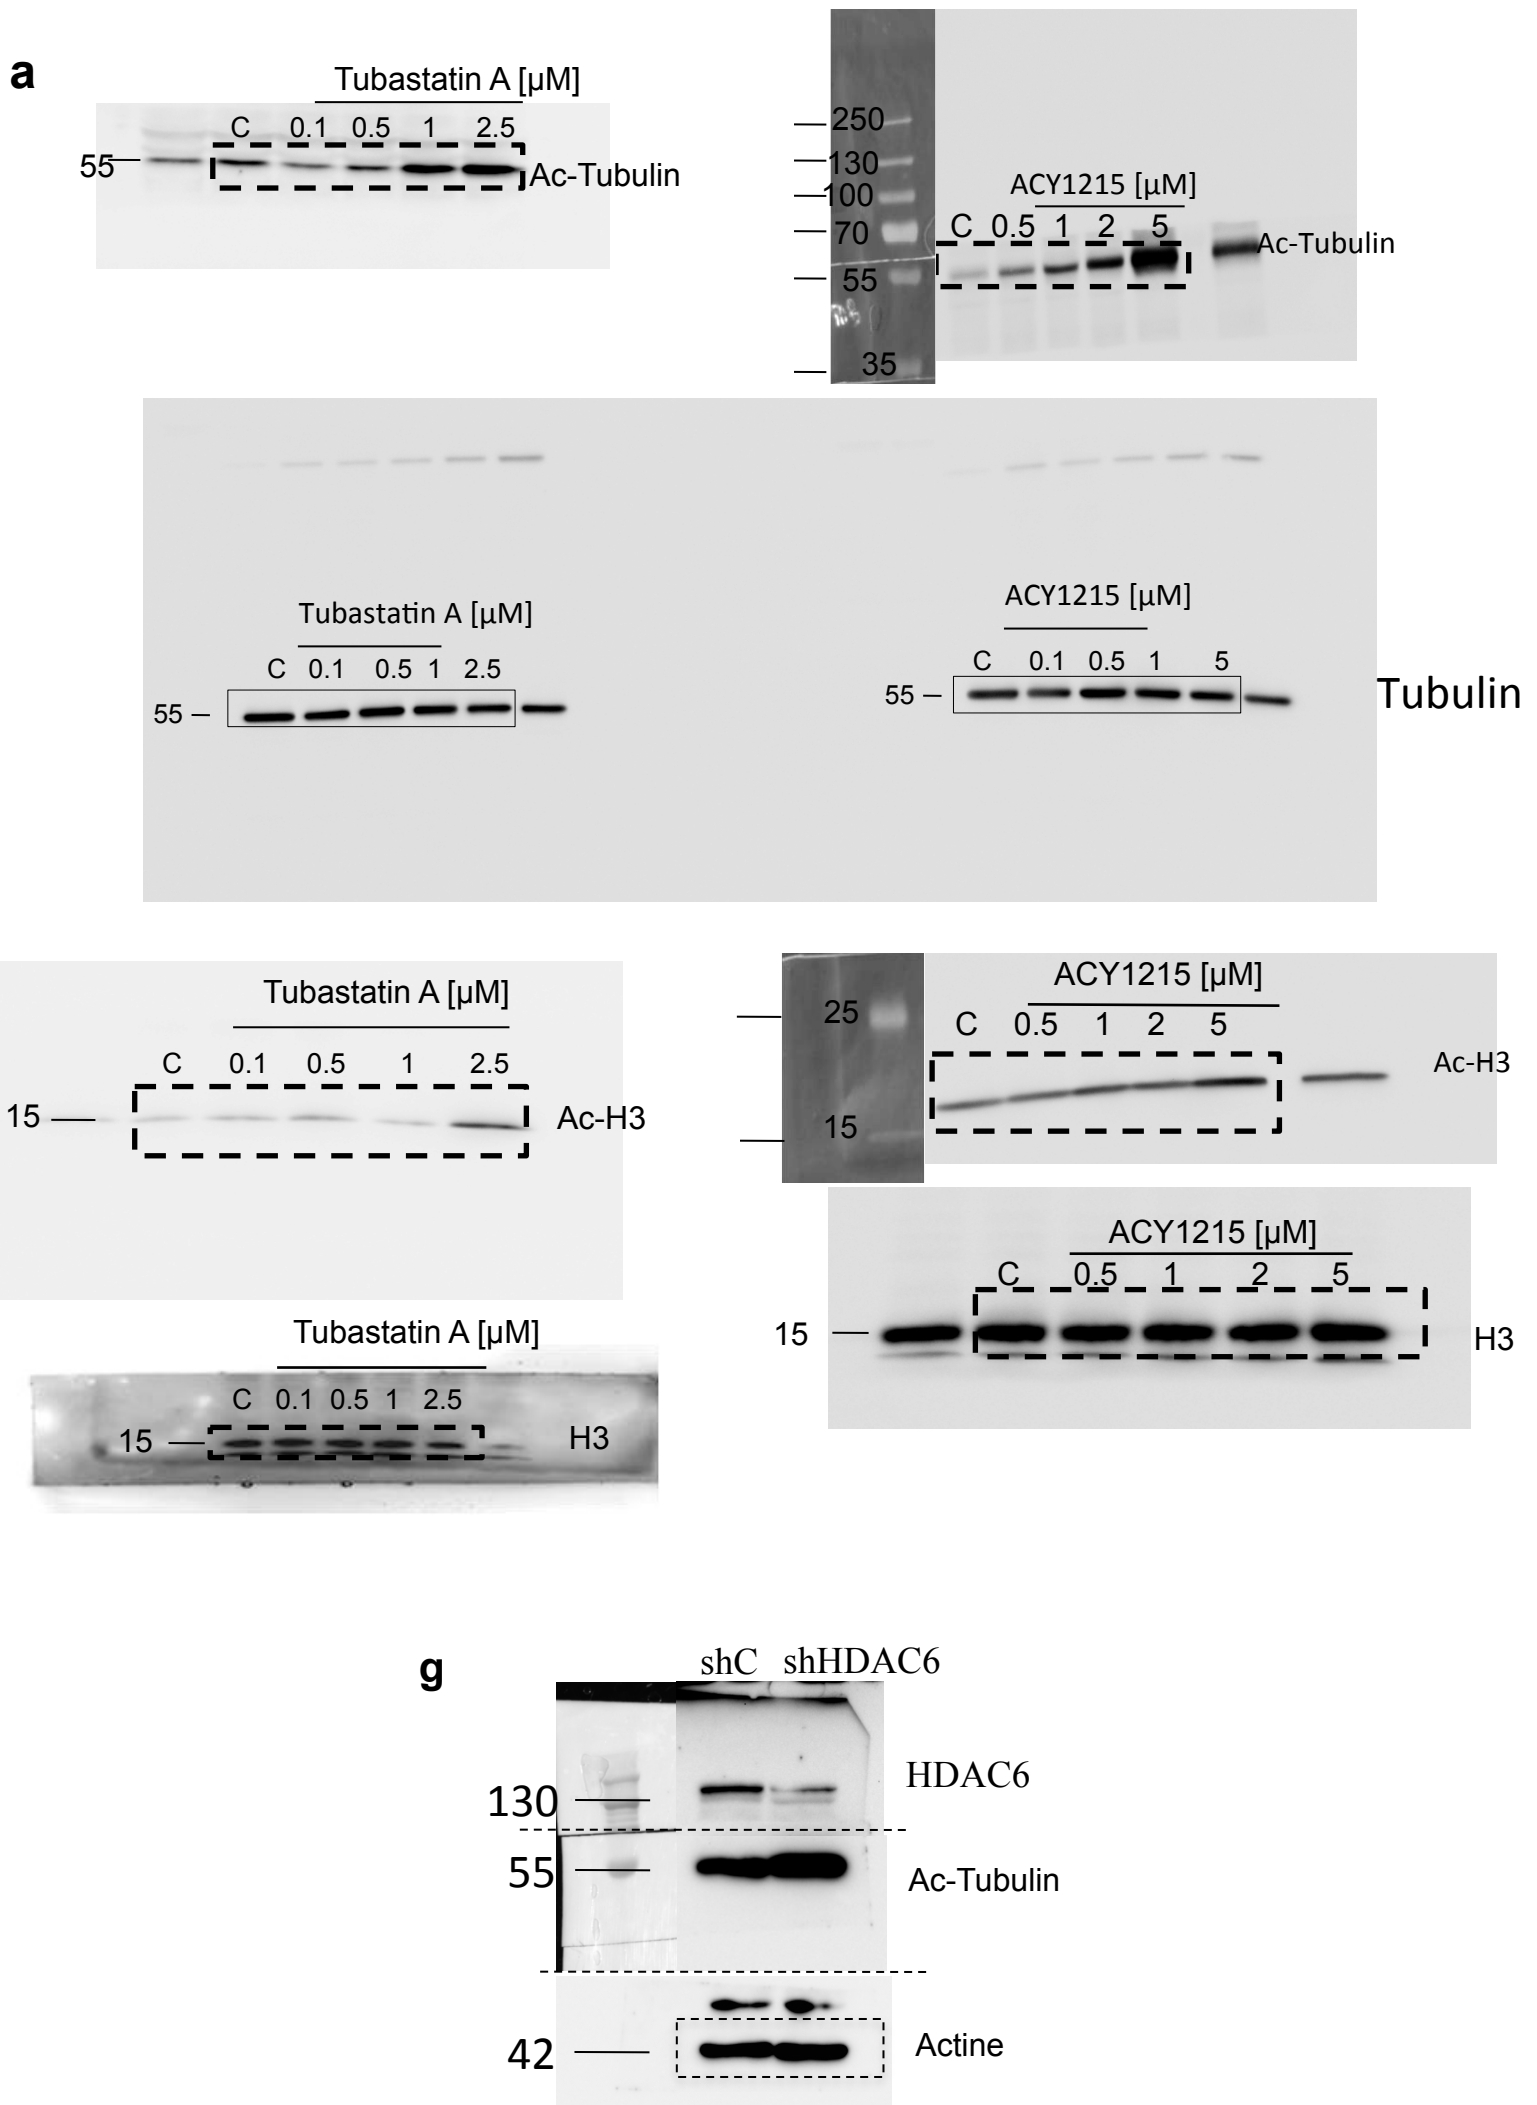



# Supplementary Figure 7

Uncropped blots related to Figure 4 a and i

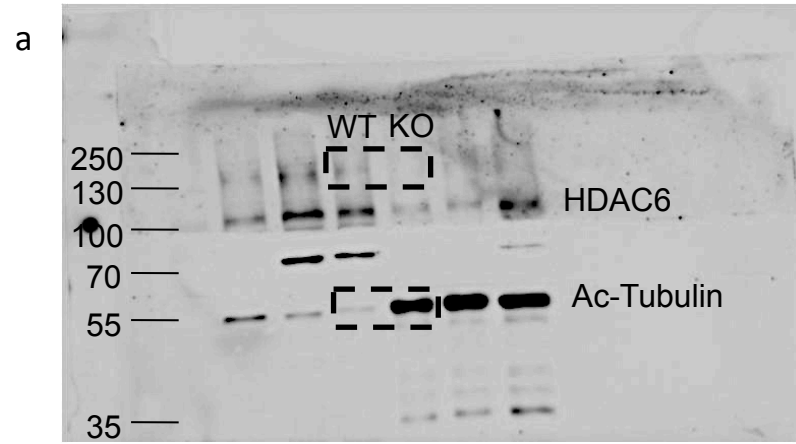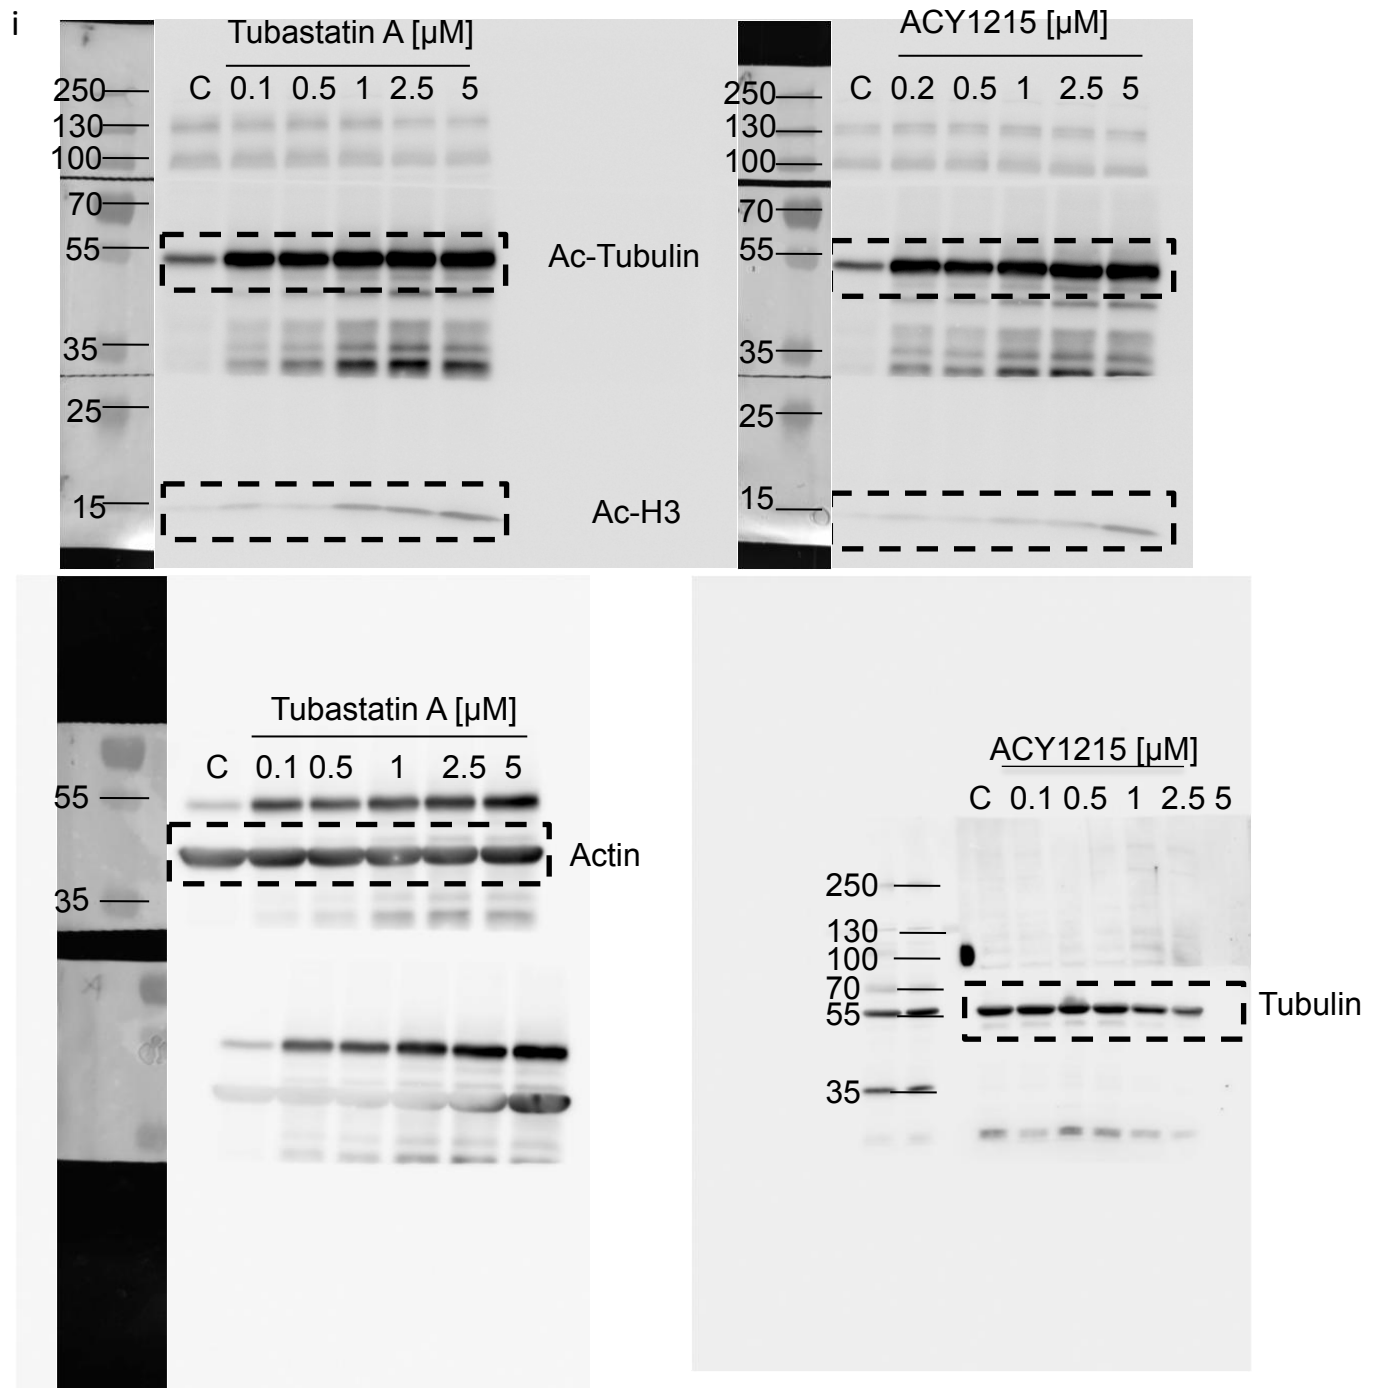

# Supplementary Figure 7

Uncropped blots related to Figure 7 b and f

**b**

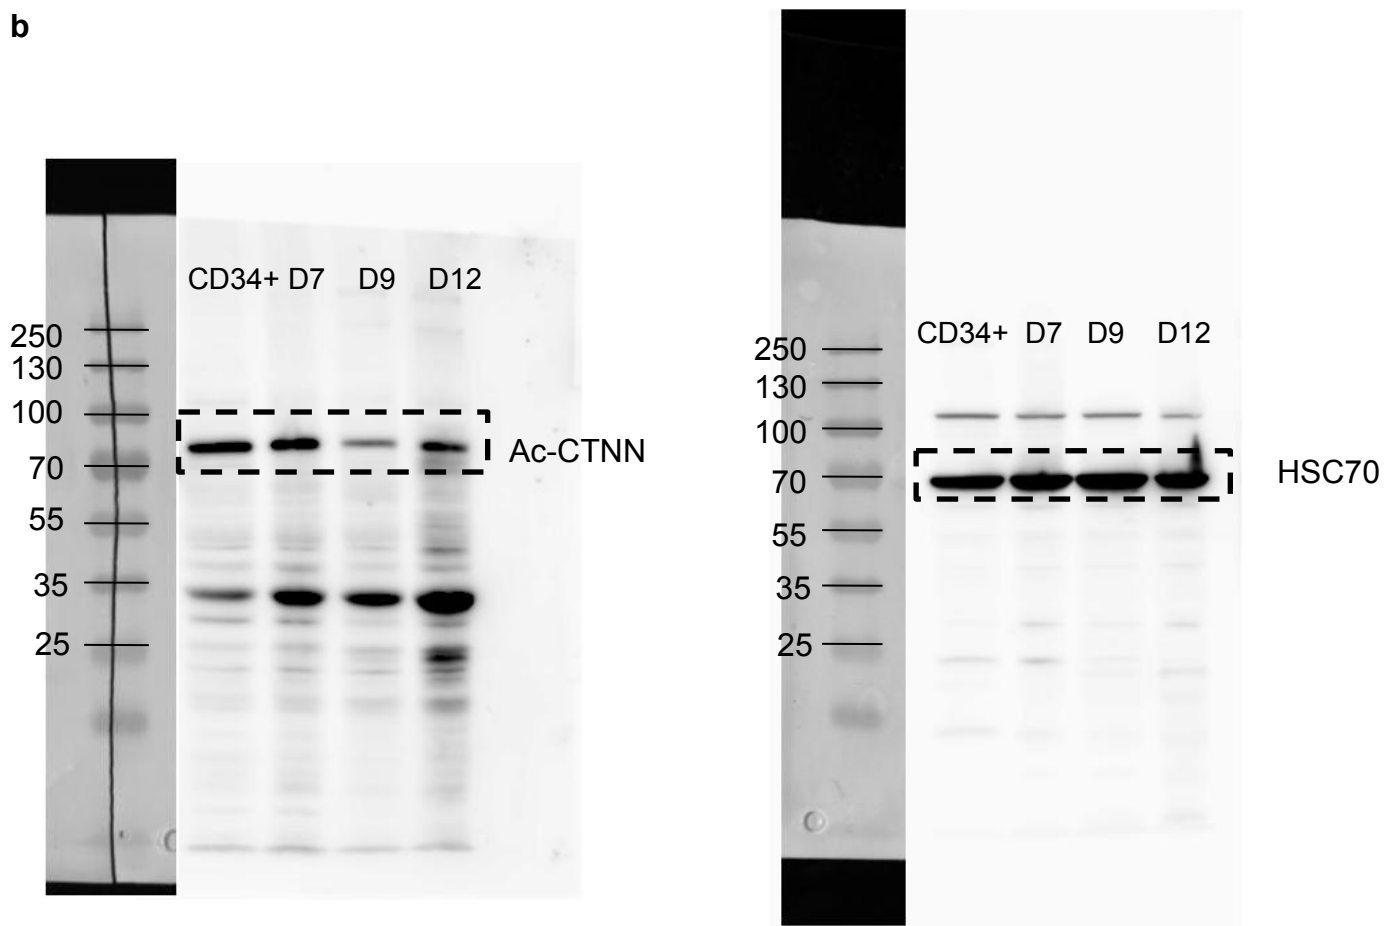

**f**

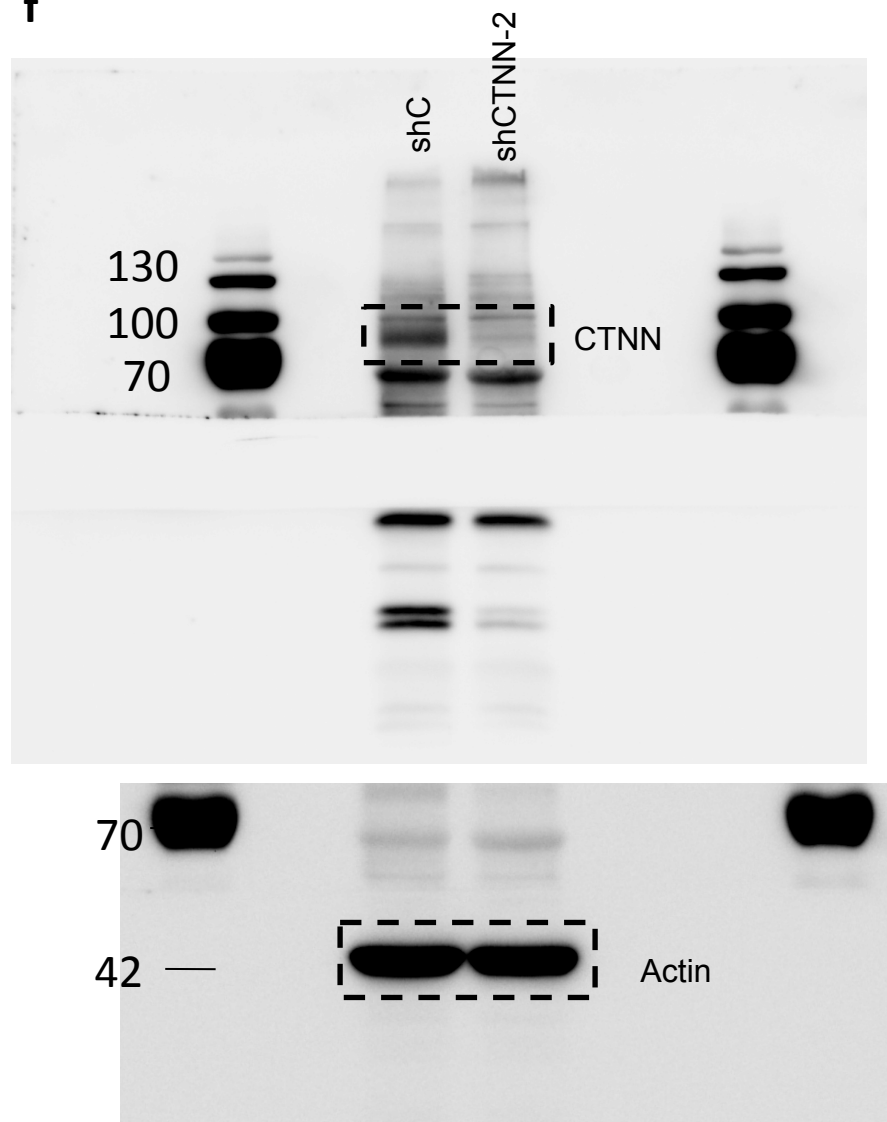

# Supplementary Figure 7

Uncropped blots related to Figure 8a, 8c ,g

**a**

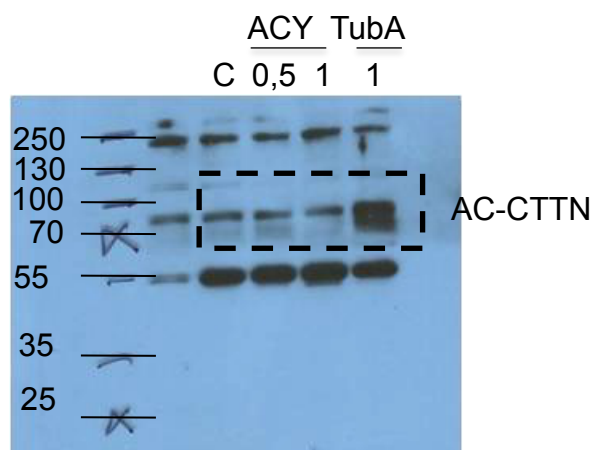

**c**

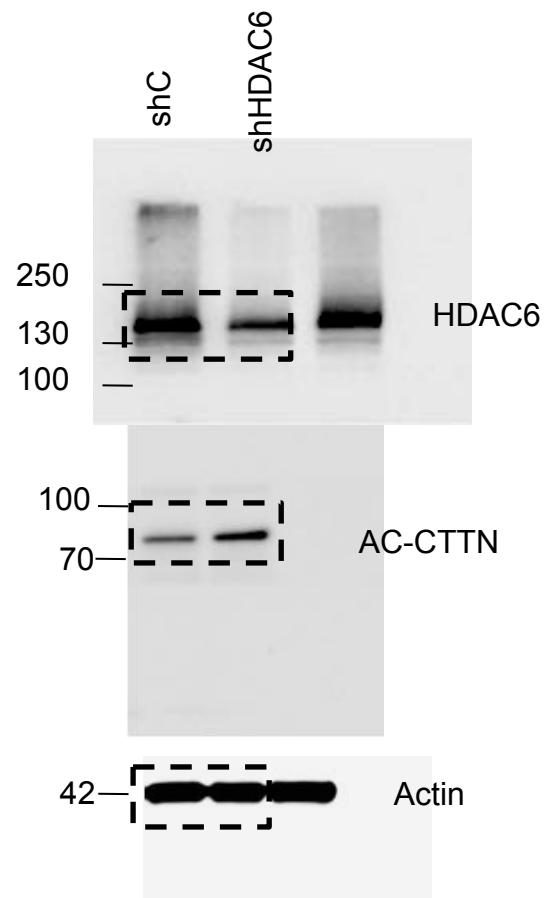

**g**

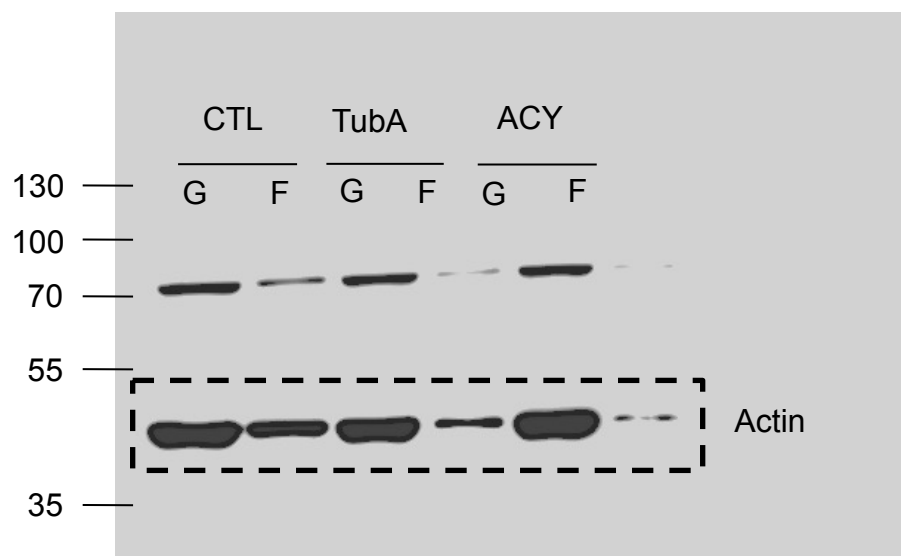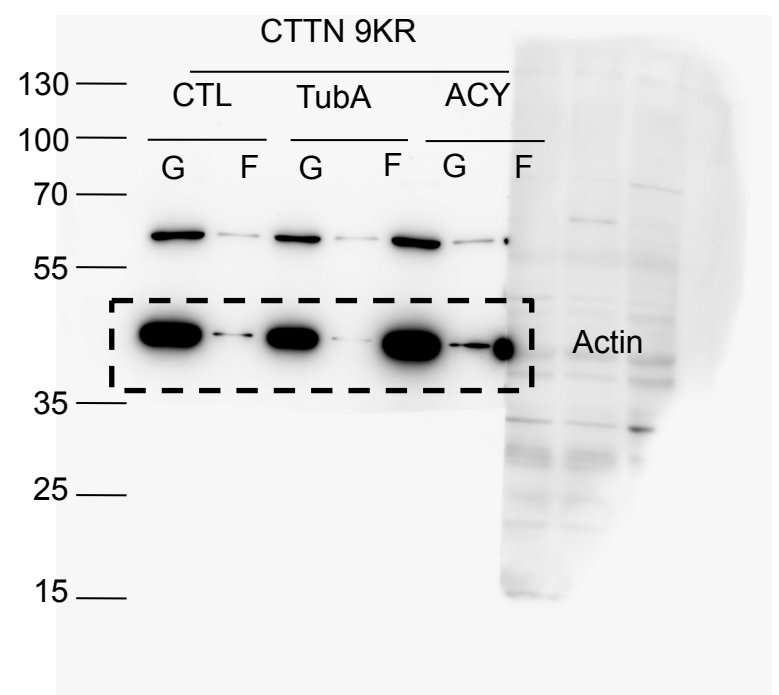

# Supplementary Figure 7

Uncropped blots related to Supplementary Figure 2 c

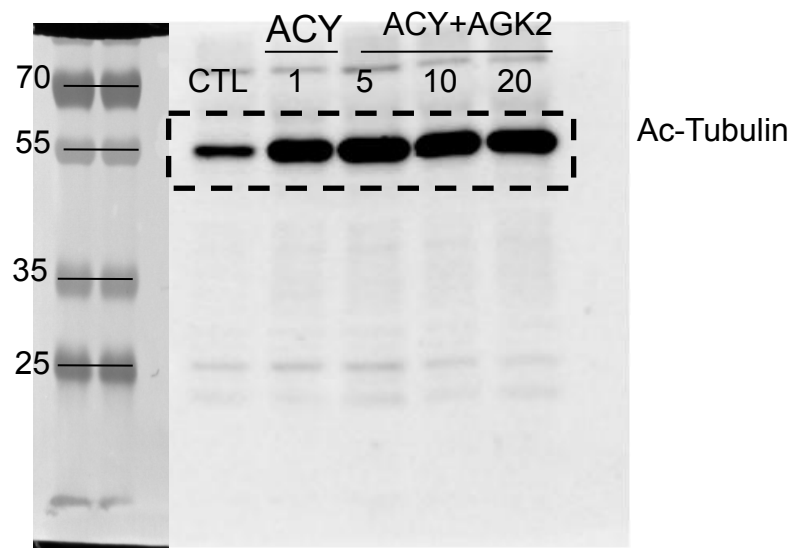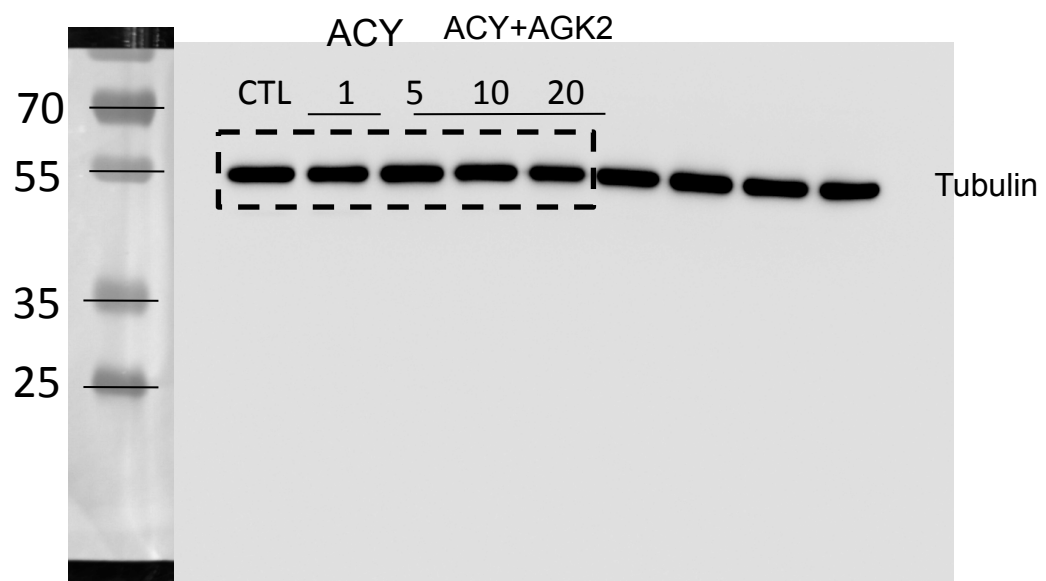

Supplemenatry Table 1

| Genes                | Primers                                               |
|----------------------|-------------------------------------------------------|
| HDAC6-F<br>HDAC6-R   | GCCTCAATCACTGAGACCATCC<br>GGTGCCTTCTTGGTGACCAACT      |
| CTTN-F<br>CTTN-R     | TGTCCTCTGCCTACCAGAAGA<br>CCTGCTCTTTCTCCTTAGCGA        |
| aTAT-F<br>aTAT-R     | GGCGAGAACTCTTCCAGTAT<br>TTGTTACCTGTGGGACT             |
| Sirt1-F<br>Sirt1-R   | GGGAATCCAAAGGATAATTCAGTGT<br>CCTCGTACAGCTTCACAGTCAACT |
| Sirt2-F<br>Sirt2-R   | AGCGGCTCCTCCCTCAGA<br>AGACCCAGGCAGGGAAGGT             |
| HDAC1-F<br>HDAC1-R   | GGTCCAAATGCAGGCGATTCCCT<br>TCGGAGAACTCTTCCTCACAGG     |
| HDAC2-F<br>HDAC2-R   | CTCATGCACCTGGTGTCCAGAT<br>GCTATCCGCTTGTCTGATGCTC      |
| HDAC3-F<br>HDAC3-R   | TGATCGTCTTCAAGCCATACCA<br>TGTGTAACGCGAGCAGAACT        |
| HDAC4-F<br>HDAC4-R   | AGGTGAAGCAGGAGCCCATTGA<br>GGTAGTTCCTCAGCTGGTGGAT      |
| HDAC5-F<br>HDAC5-R   | CGCTGAGAATGGCTTTACTGGC<br>GTGTAGAGGCTGAACTGGTTGG      |
| HDAC7-F<br>HDAC7-R   | TCCTGGCACAGCGGATGTTTGT<br>TGAAGGCGAGGTCAGTGACACT      |
| HDAC8-F<br>HDAC8-R   | TGTGCTGGAAATCACGCCAAGC<br>ACCACTCCTCAGCTCTGGAAAC      |
| HDAC9-F<br>HDAC9-R   | TCTCGTCTCCAGGACTCACTCT<br>GCACTGGTGTTCAGCATCAAGG      |
| HDAC10-F<br>HDAC10-R | GAGGAGTCTGTGGCTGAACATC<br>CCAAGATGCAGCTCAGGAAACC      |
| HDAC11-F<br>HDAC11-R | CTTCTGTGCCTATGCGGACATC<br>GAAGTCTCGCTCATGCCCATTG      |
